# Supplementary material for: Self-assembly of azamacrocyclic ligands into vesicular structures: from design to functional properties and applications
Source: Royal Society of Chemistry journal article supplement (doi:10.1039/d5ob01736j), 2025-01-01
Supplement: d5ob01736j1.pdf [file d5ob01736j1.pdf]

## Electronic Supplementary Information

### Self-Assembly of Azamacrocyclic Ligands into Vesicular Structures: From Design to Functional Properties and Applications.

Mercy E. Arteaga-Vinza, Salvador Blasco, M. Paz Clares, M. Teresa Albelda, Juan. C. Frías, Lucía Bernat-Just, Phuong Linh Ta, Alicia López-Castellano, Jonathan L. Sessler and Enrique García-España.

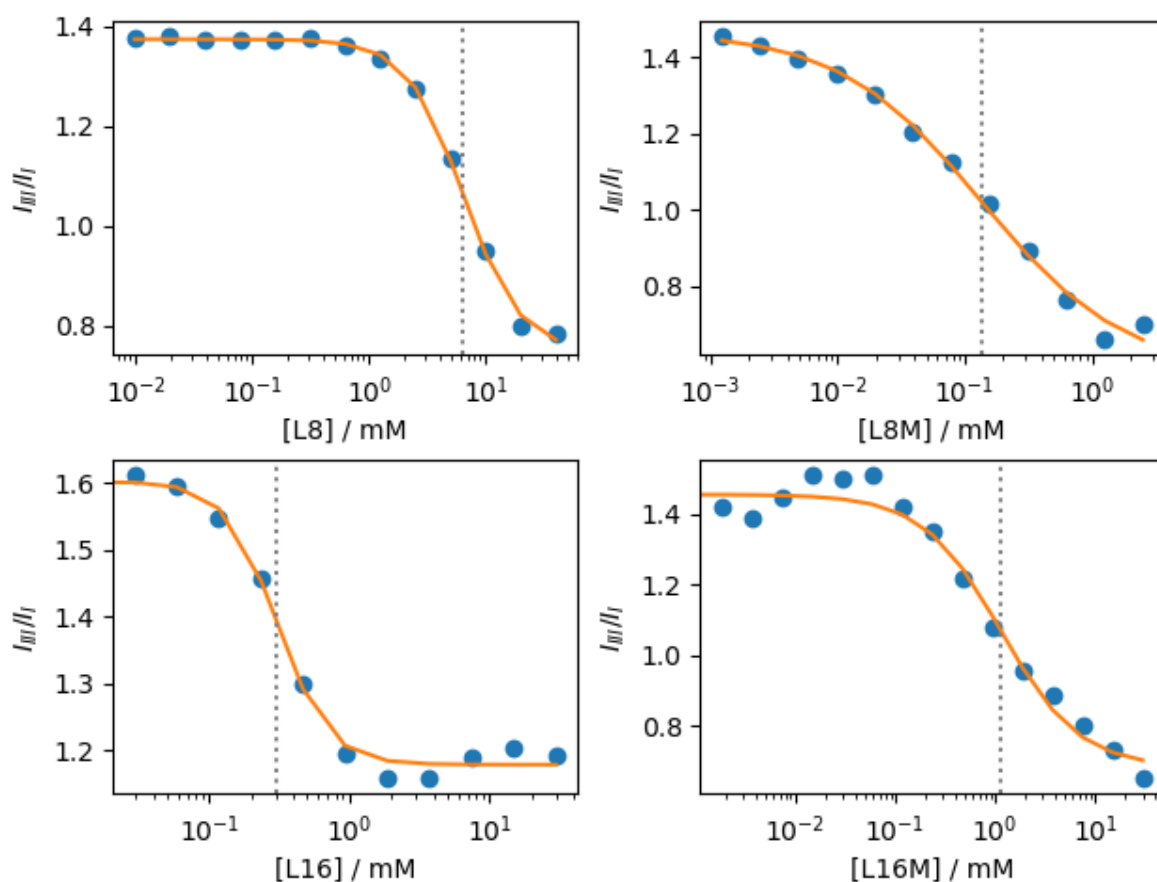

**Figure S1:** Critical micelle concentration data measured with the pyrene method in tris buffer 20mM at pH=7.4. The dotted line represents the calculated CMC.

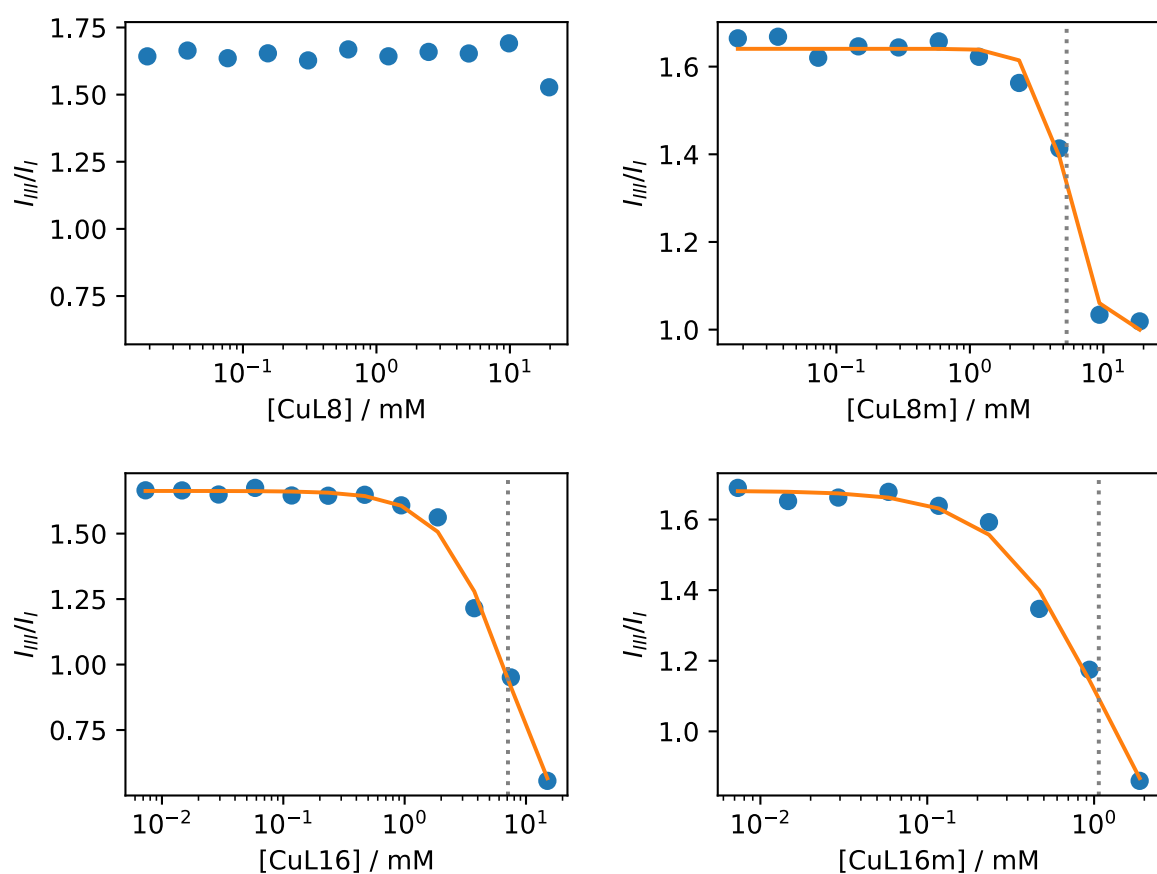

**Figure S2:** Critical micelle concentration data measured with the pyrene method in HEPES buffer 20mM at pH=7.4. The dotted line represents the calculated CMC.

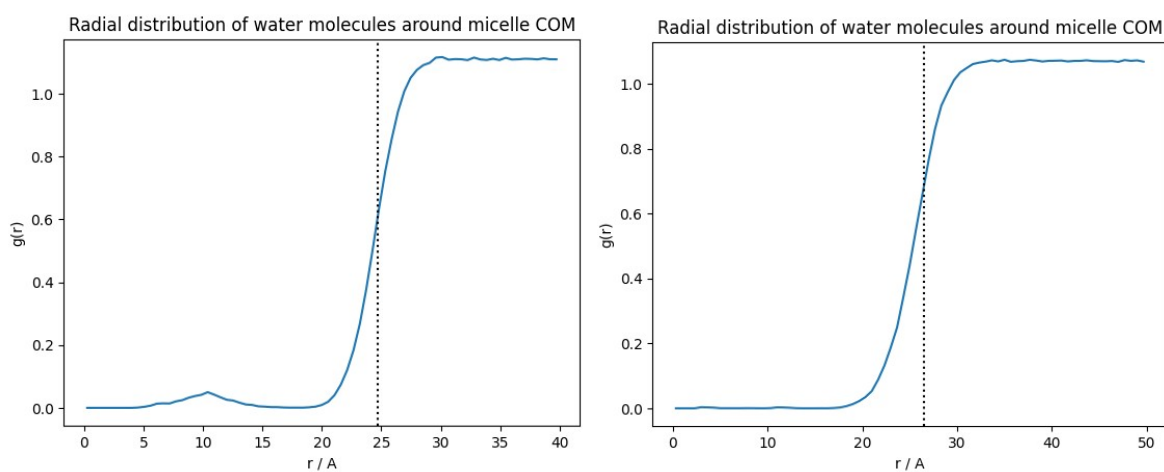

**Figure S3:** Radial distribution of water molecules with respect to the centre-of-mass of the micelle. **L8** (left) and **L8M** (right). The vertical dotted lines represent the calculated micellar radii.

**Table S1:** Crystallographic data

|                                      |                                                                         |
|--------------------------------------|-------------------------------------------------------------------------|
| Composition                          | C <sub>21</sub> H <sub>39</sub> CuN <sub>5</sub> , 2(ClO <sub>4</sub> ) |
| Formula weight / g·mol <sup>-1</sup> | 624.01                                                                  |
| Size / mm                            | 0.138×0.104×0.051                                                       |
| Space group                          | <i>P</i> 2 <sub>1</sub> /c                                              |
| Unit cell                            |                                                                         |
| • <i>a</i> / Å                       | 20.919(5)                                                               |
| • <i>b</i> / Å                       | 8.778(3)                                                                |
| • <i>c</i> / Å                       | 14.947(4)                                                               |
| • $\alpha$ / degrees                 | 90                                                                      |
| • $\beta$ / degrees                  | 97.900(9)                                                               |
| • $\gamma$ / degrees                 | 90                                                                      |
| • <i>V</i> / Å <sup>3</sup>          | 2718.7(12)                                                              |
| Density / g·cm <sup>-3</sup>         | 1.53                                                                    |
| <i>Z</i>                             | 4                                                                       |
| $\mu$ / mm <sup>-1</sup>             | 1.05                                                                    |
| F000                                 | 1308                                                                    |
| Diffraction Limits                   | 29 ≤ <i>h</i> ≤ -29                                                     |
|                                      | 12 ≤ <i>k</i> ≤ -12                                                     |
|                                      | 21 ≤ <i>l</i> ≤ -21                                                     |
| R(int)                               | 0.1042                                                                  |
| R(sigma)                             | 0.0575                                                                  |
| Reflections                          |                                                                         |
| • Collected                          | 58548                                                                   |
| • Unique                             | 8299                                                                    |
| Parameters                           | 365                                                                     |
| Constraints                          | 0                                                                       |
| Restraints                           | 1                                                                       |
| <i>R</i> 1                           |                                                                         |
| • total                              | 0.1138                                                                  |
| • $F^2 > 2\sigma(F^2)$               | 0.0706                                                                  |
| <i>wR</i> 2                          |                                                                         |
| • total                              | 0.1911                                                                  |
| • $F^2 > 2\sigma(F^2)$               | 0.1661                                                                  |
| Goodness of Fit                      | 1.029                                                                   |

**Table S2:** Bond distances (in angstrom) and angles (in degrees) for crystal structure **CuL8** (this work) and **CuL** for comparison (from *Inorg Chem* 2007, 46(14), 5707-5719). The crystal **CuL** contains two separate moieties, both of which are shown here, and the atom labelling in the referenced paper do not match those for **CuL8** in this work, but in this table they have been rearranged so that the number corresponds to the analog atom in the **CuL8** crystal.

|           | <b>CuL8</b> | <b>CuL</b> |          |
|-----------|-------------|------------|----------|
| Cu1–N1    | 1.930(3)    | 1.950(9)   | 1.938(8) |
| Cu1–N2    | 2.108(3)    | 2.074(9)   | 2.116(8) |
| Cu1–N3    | 2.200(3)    | 2.189(9)   | 2.231(8) |
| Cu1–N4    | 2.125(3)    | 2.097(9)   | 2.104(8) |
| Cu1–N5    | 2.005(3)    | 2.052(9)   | 1.997(8) |
| N1–Cu1–N2 | 81.35(13)   | 81.0(4)    | 81.5(3)  |
| N1–Cu1–N3 | 100.12(13)  | 119.5(3)   | 99.4(3)  |
| N1–Cu1–N4 | 81.67(13)   | 82.3(4)    | 82.3(4)  |
| N2–Cu1–N3 | 84.29(12)   | 83.3(3)    | 82.5(3)  |
| N4–Cu1–N3 | 83.48(12)   | 84.7(3)    | 84.5(3)  |
| N5–Cu1–N2 | 97.13(14)   | 103.5(4)   | 99.7(3)  |
| N5–Cu1–N3 | 85.15(14)   | 82.7(3)    | 82.7(3)  |
| N5–Cu1–N4 | 101.21(14)  | 100.8(4)   | 98.0(3)  |
| $\tau_5$  | 0.289       | 0.267      | 0.108    |

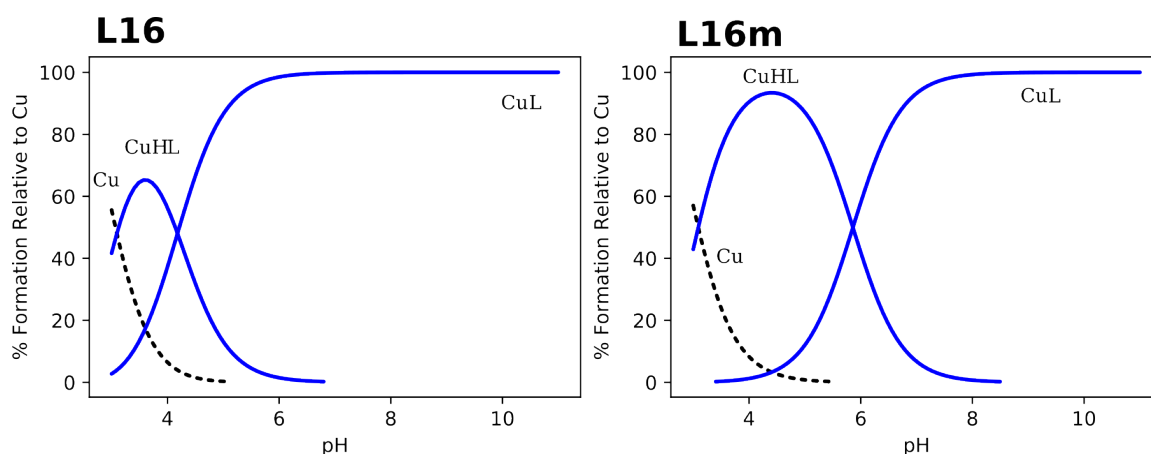

**Figure S4:** Distribution diagrams for the systems referred to as  $\text{Cu}^{2+}$ -**L16** and  $\text{Cu}^{2+}$ -**L16m** as a function of pH. The metal cation-ligand ratio was 1:1 ( $[\text{L}]=[\text{Cu}^{2+}] = 10^{-3}$  M). Dashed lines represents the molar fraction of free  $\text{Cu}^{2+}$ .

**Figure S5:**  $^1\text{H}$ -NMR spectrum for **L8**

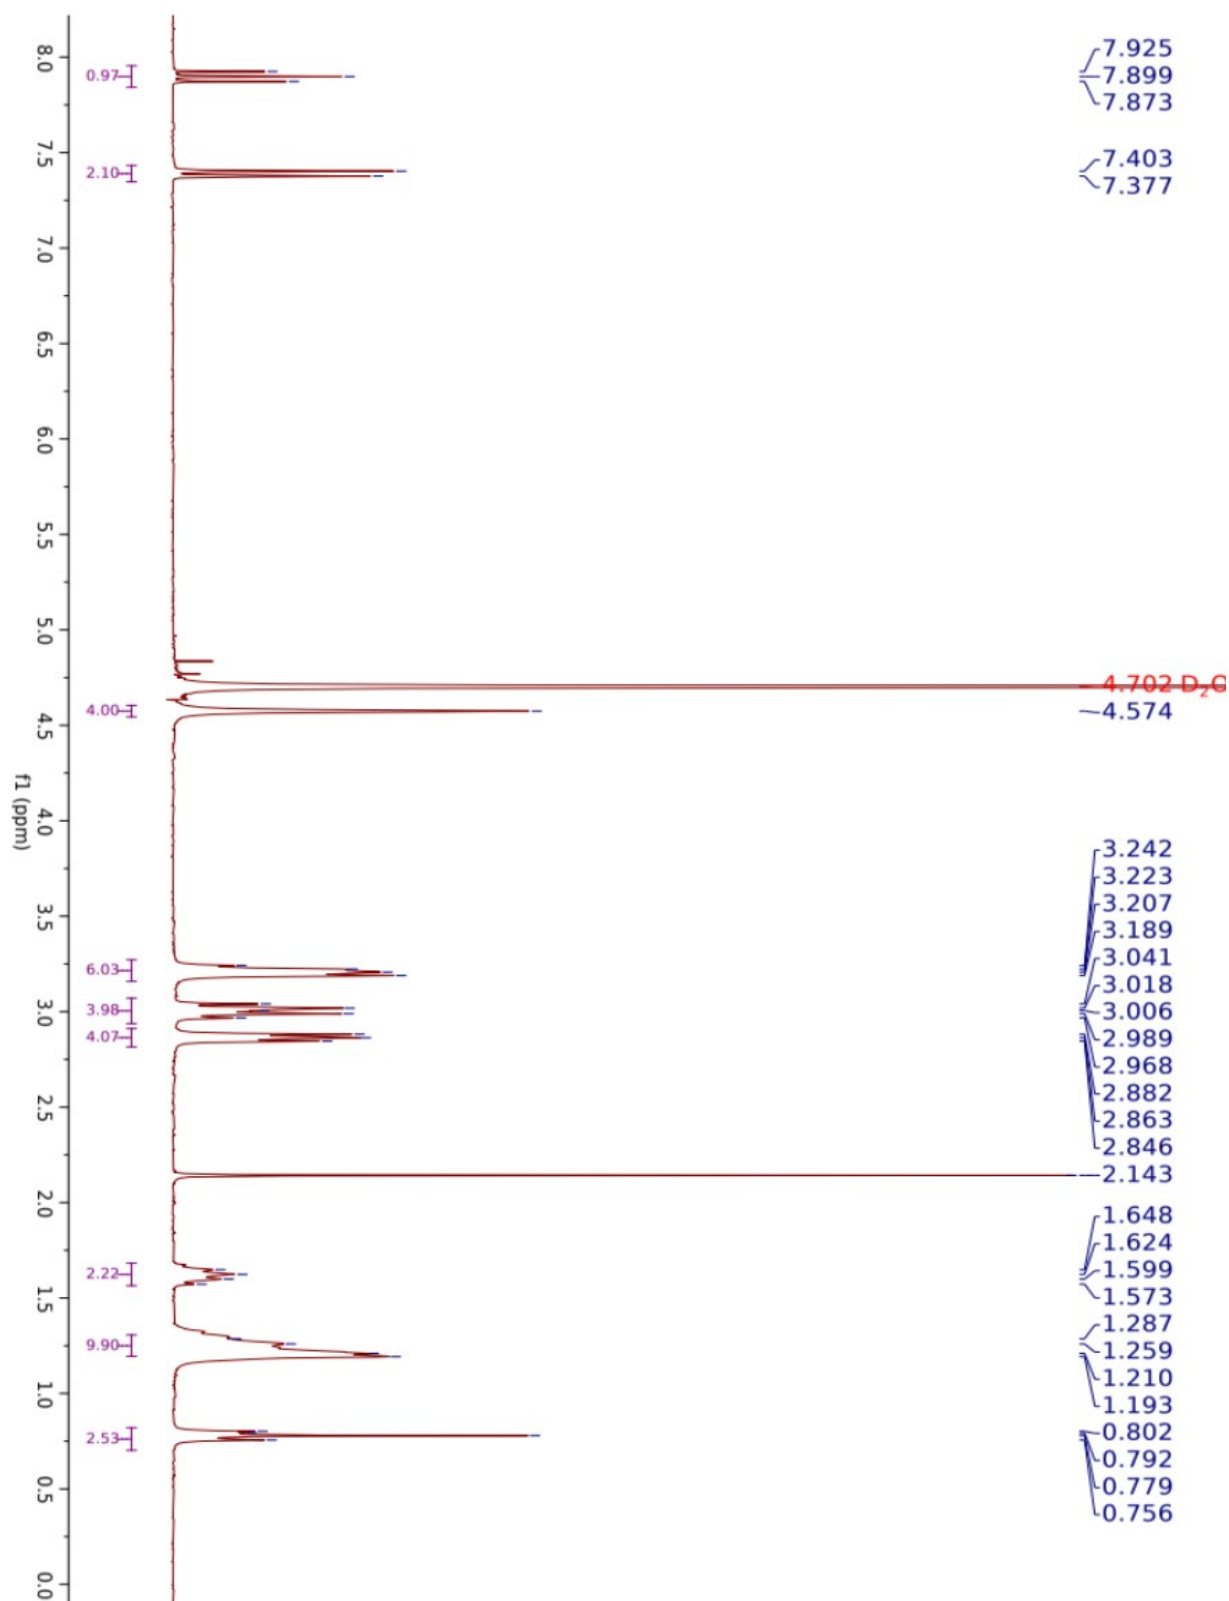

**Figure S6:**  $^{13}\text{C}$ -NMR spectrum for L8

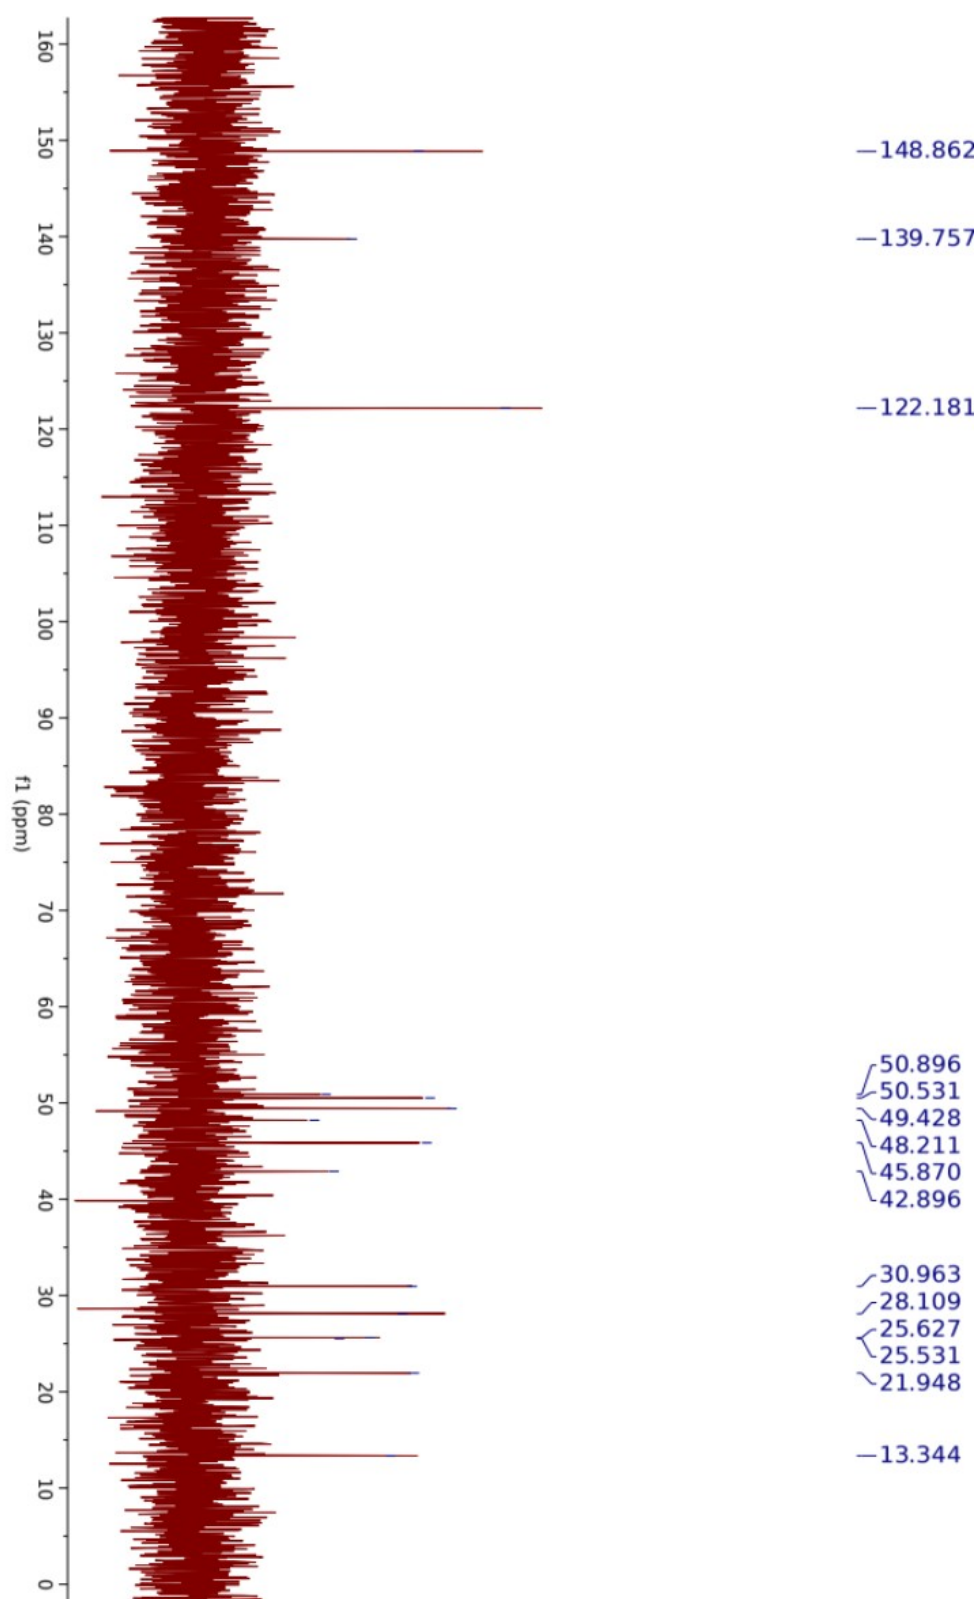

**Figure S7:**  $^1\text{H}$ -NMR spectrum for L8Ts

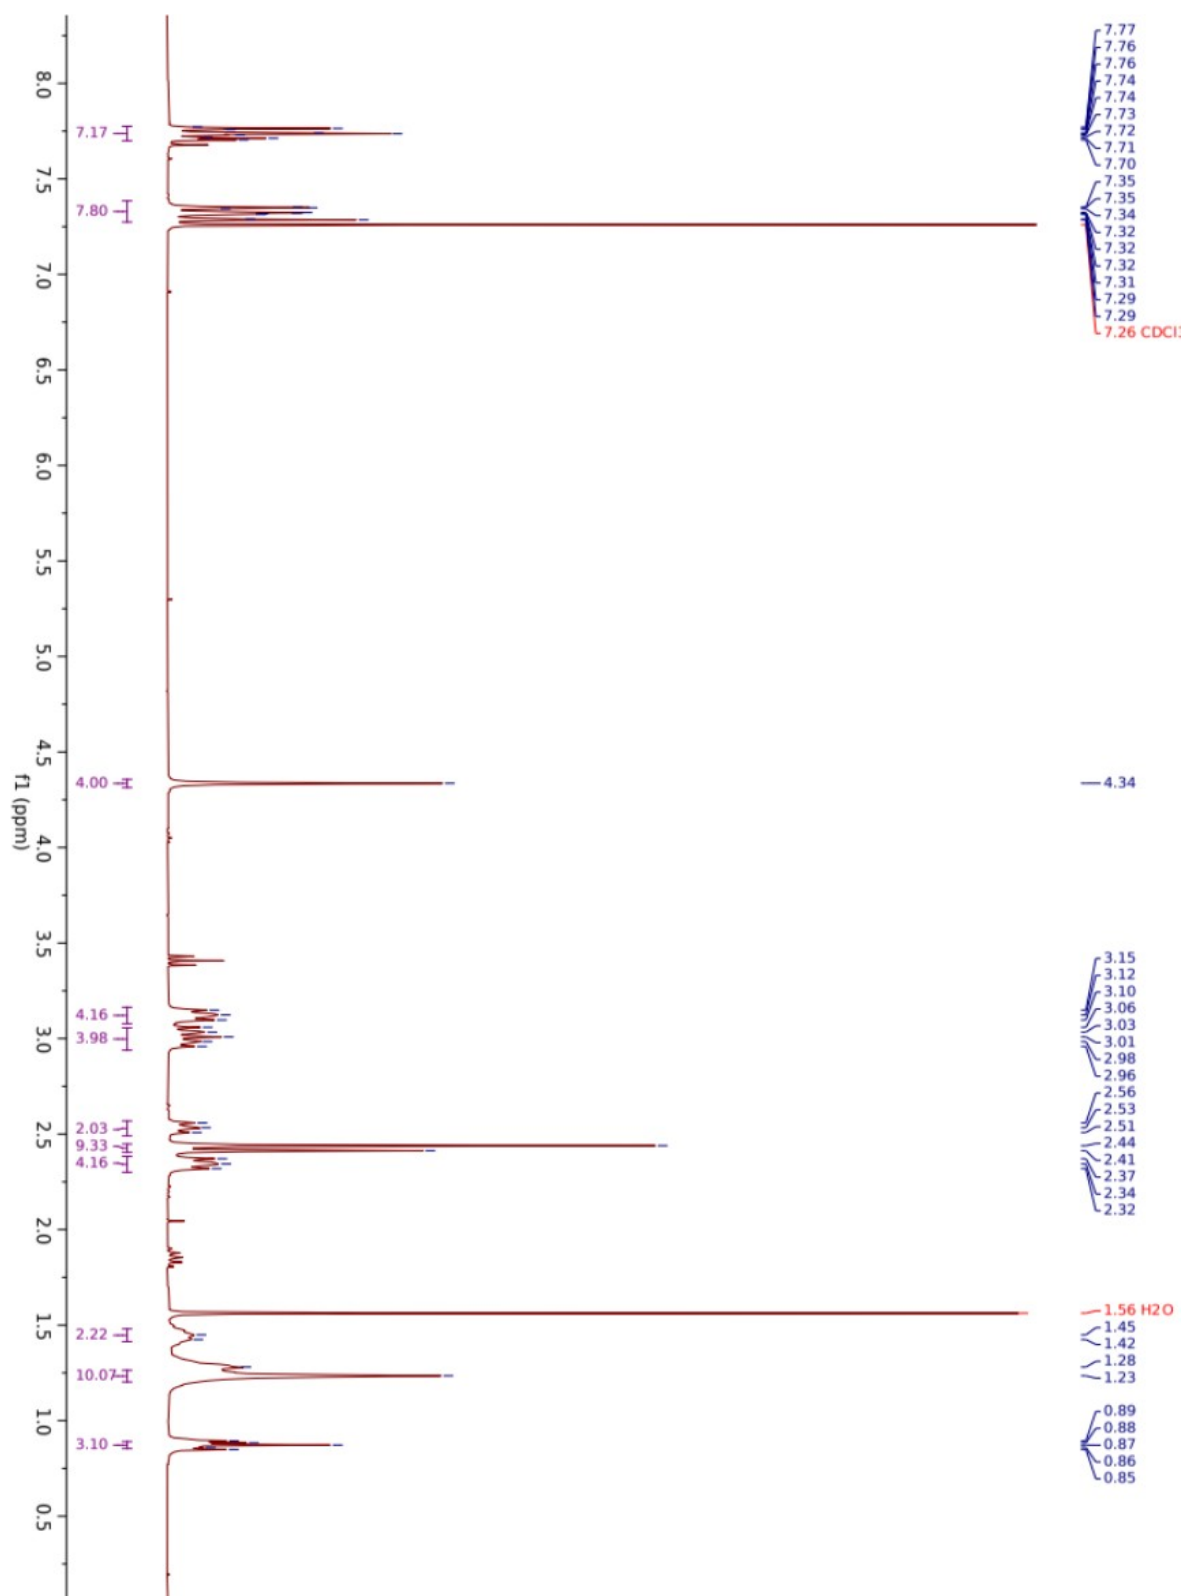

**Figure S8:**  $^{13}\text{C}$ -NMR spectrum for L8Ts

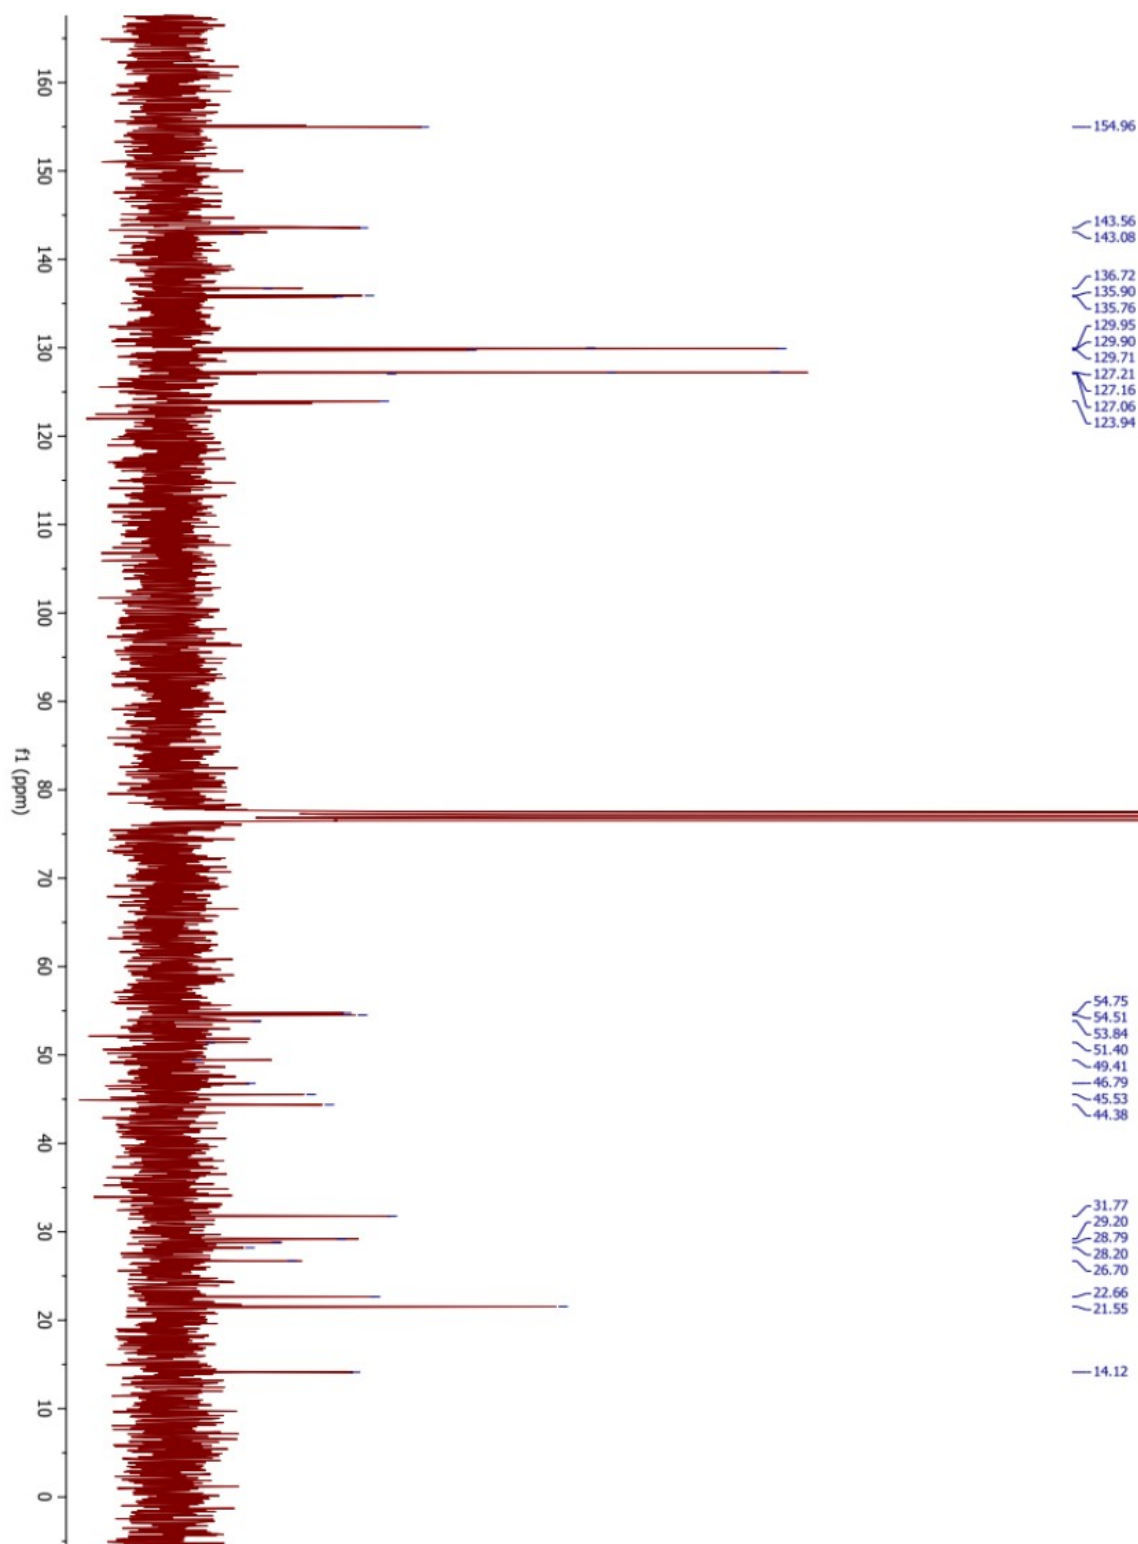



Figure S9:  $^1\text{H}$ -NMR spectrum for L8m

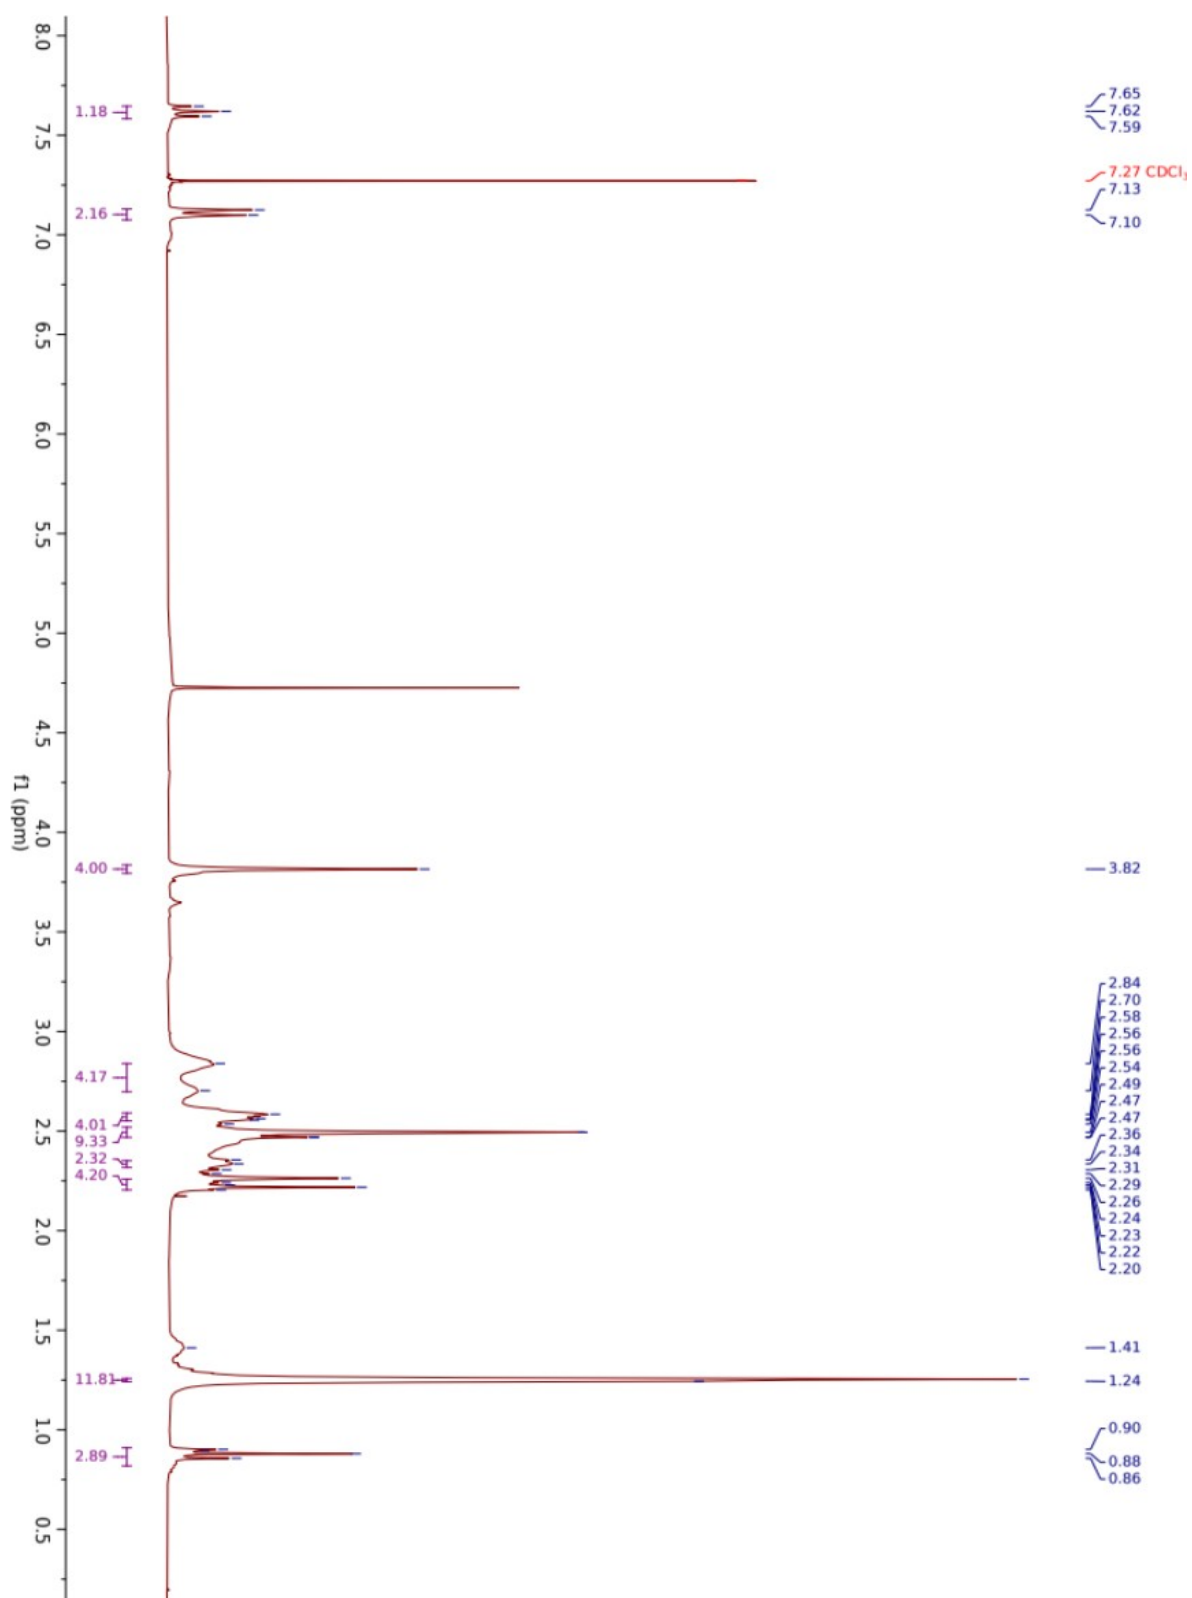

**Figure S10:**  $^{13}\text{C}$ -NMR spectrum for L8m

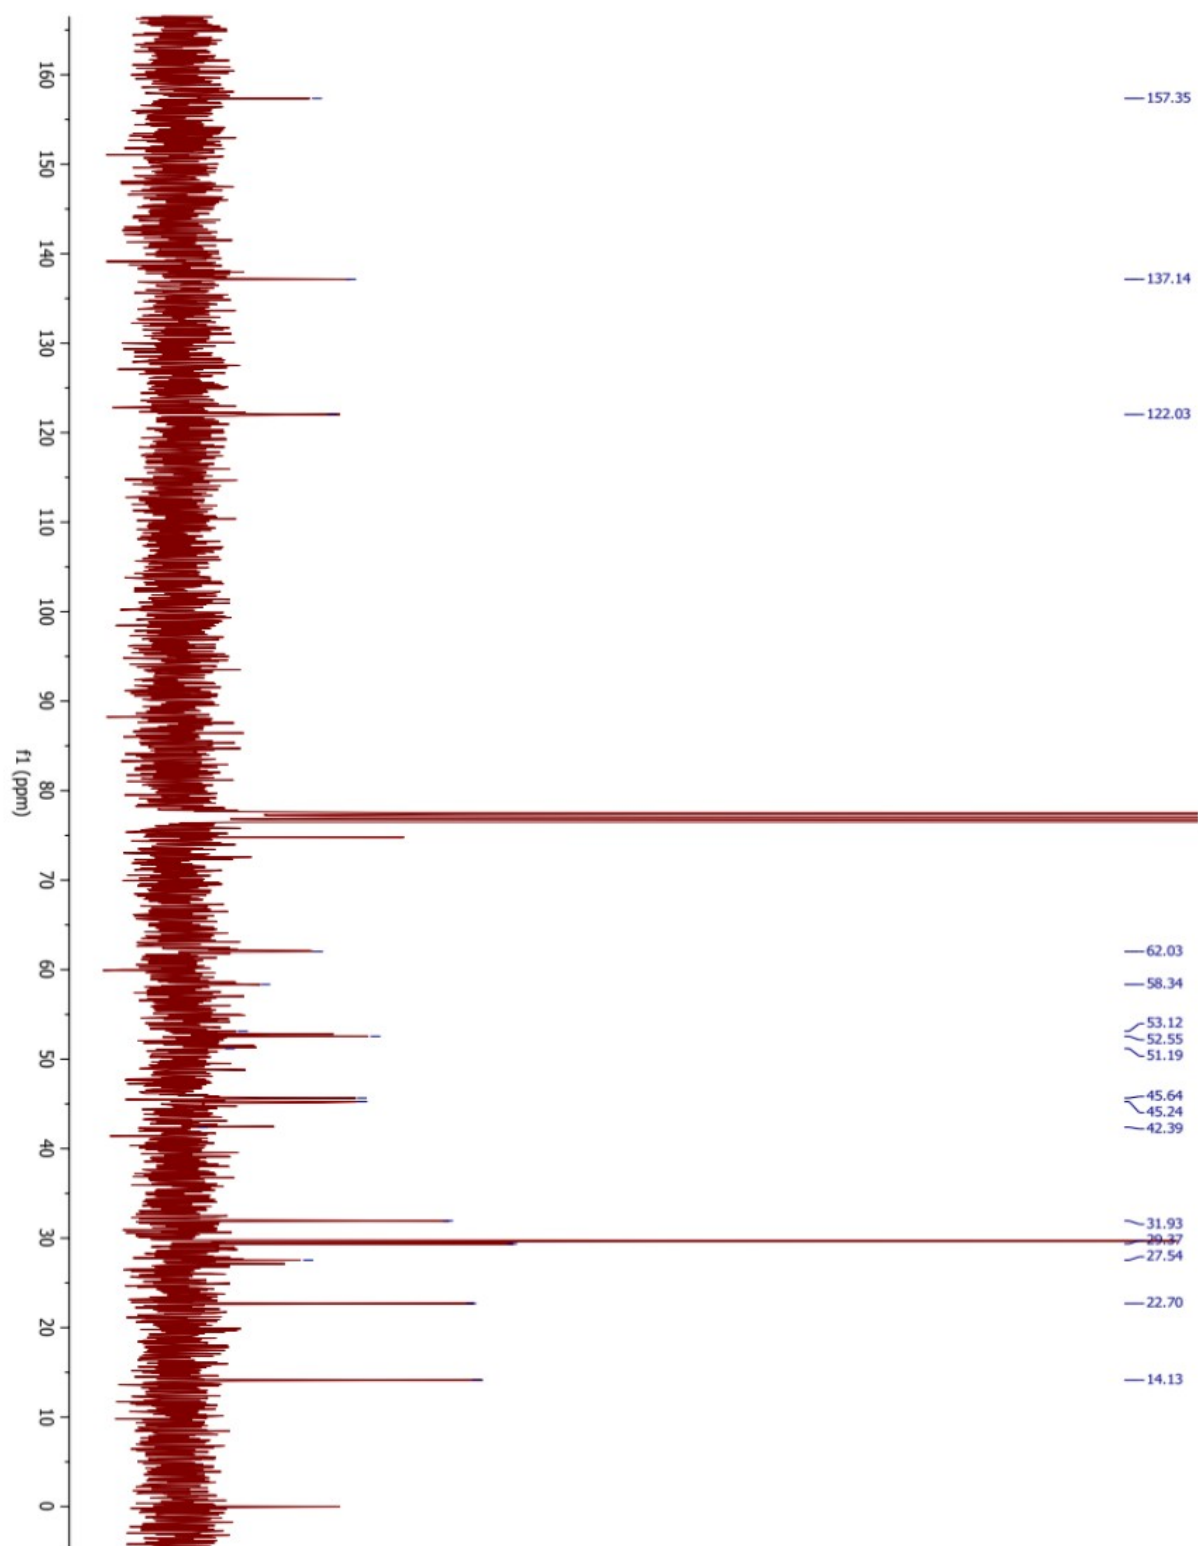

**Figure S11:**  $^1\text{H}$ -NMR spectrum for **L16Ts**

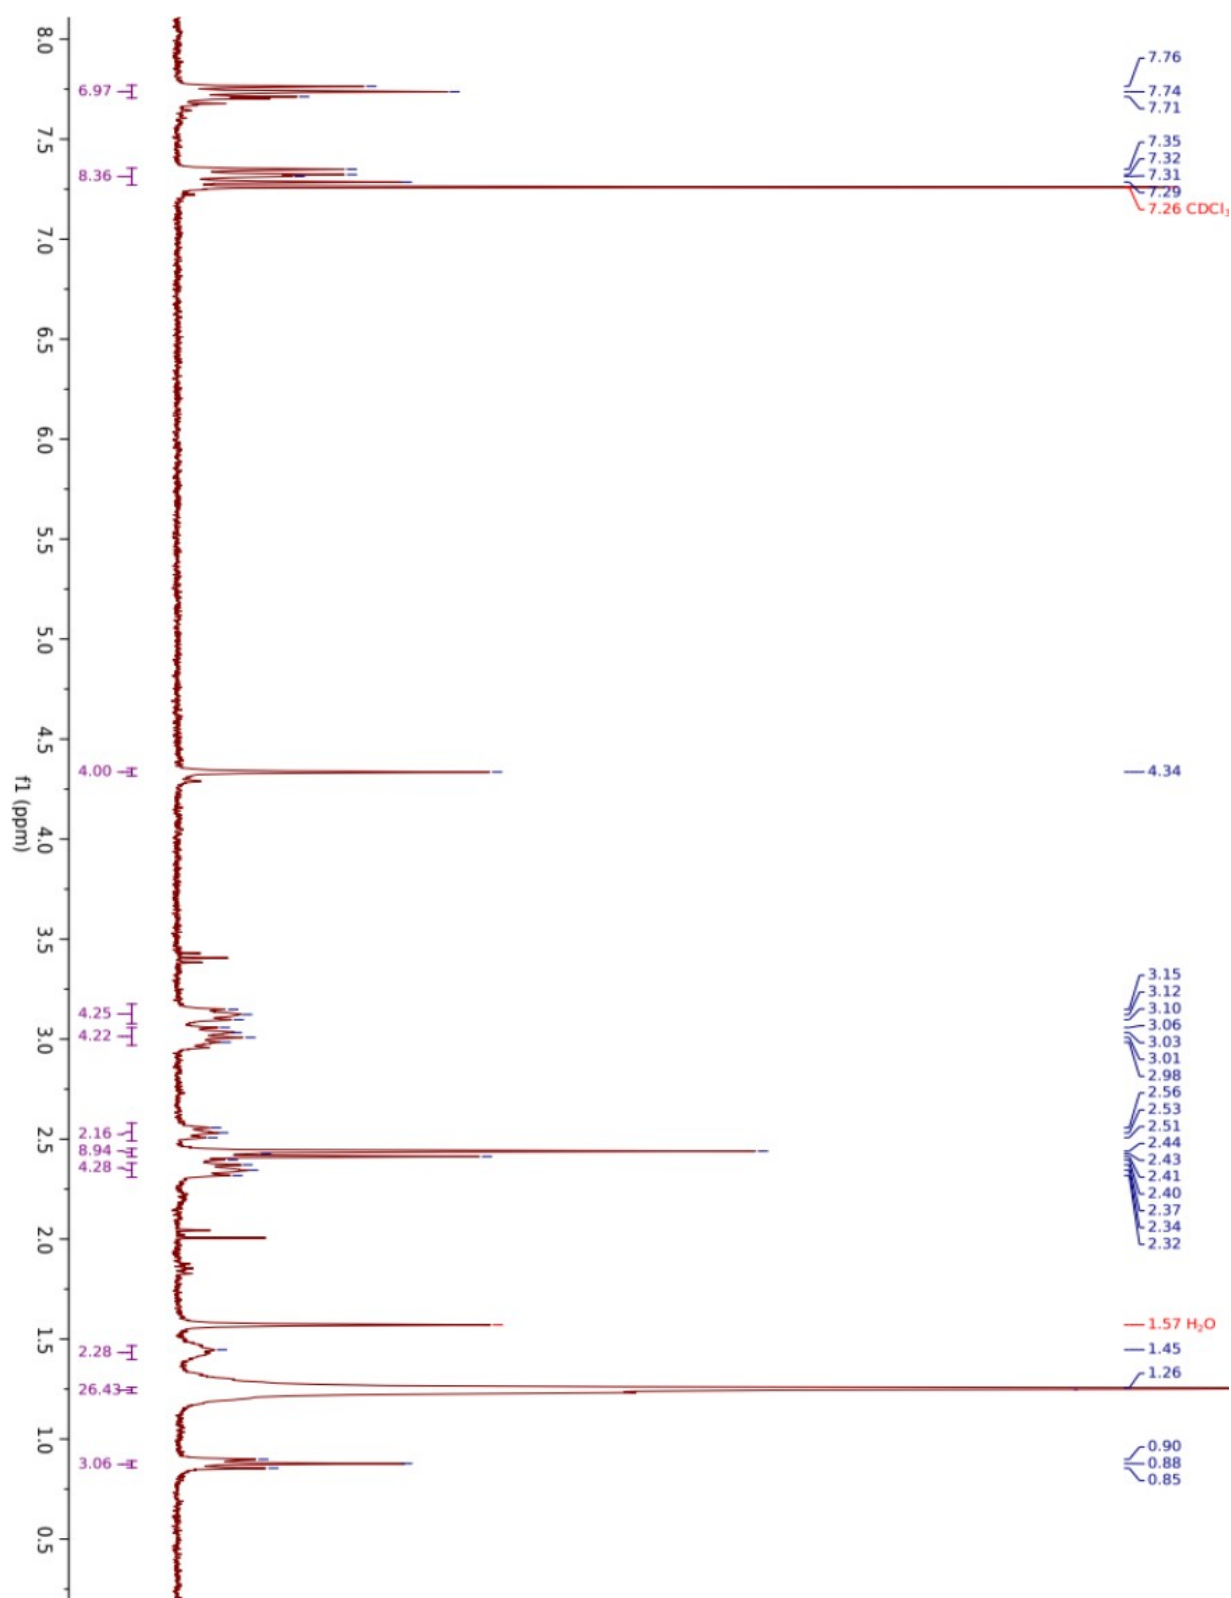

**Figure S12:**  $^{13}\text{C}$ -NMR spectrum for **L16Ts**

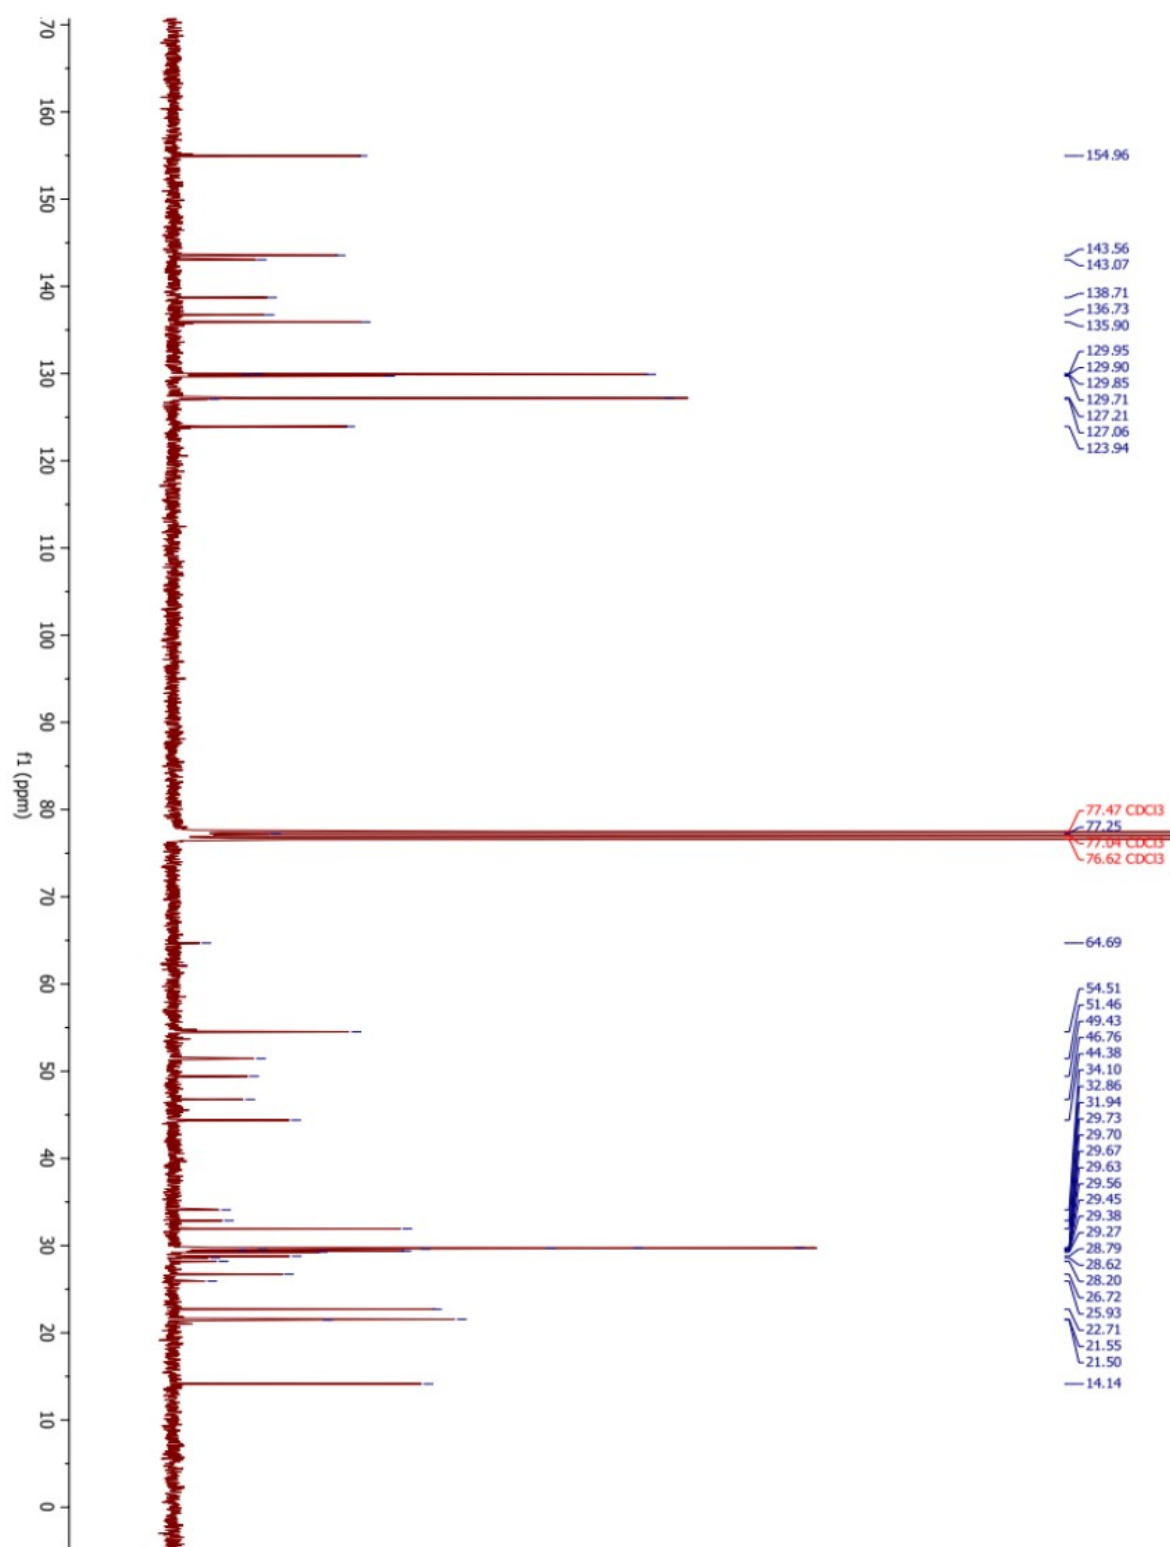

**Figure S13:**  $^1\text{H}$ -NMR spectrum for **L16**

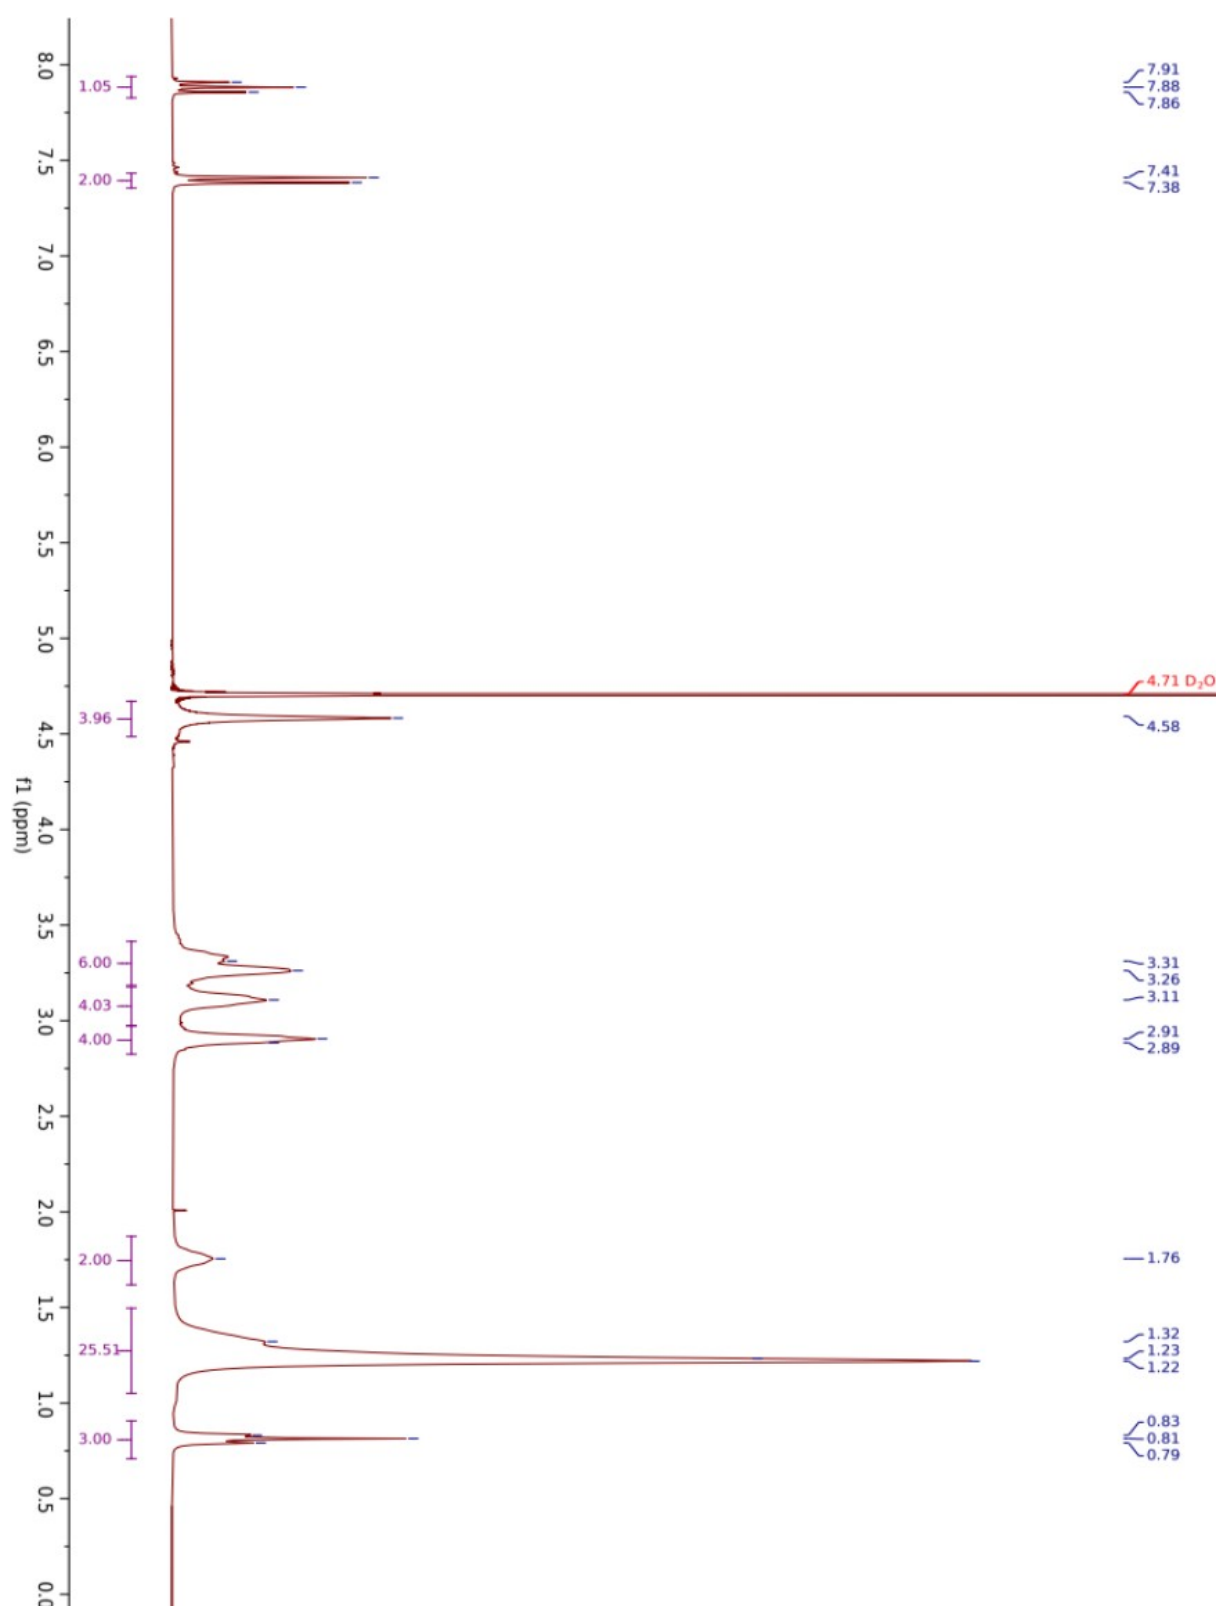

**Figure S14:**  $^{13}\text{C}$ -NMR spectrum for **L16**

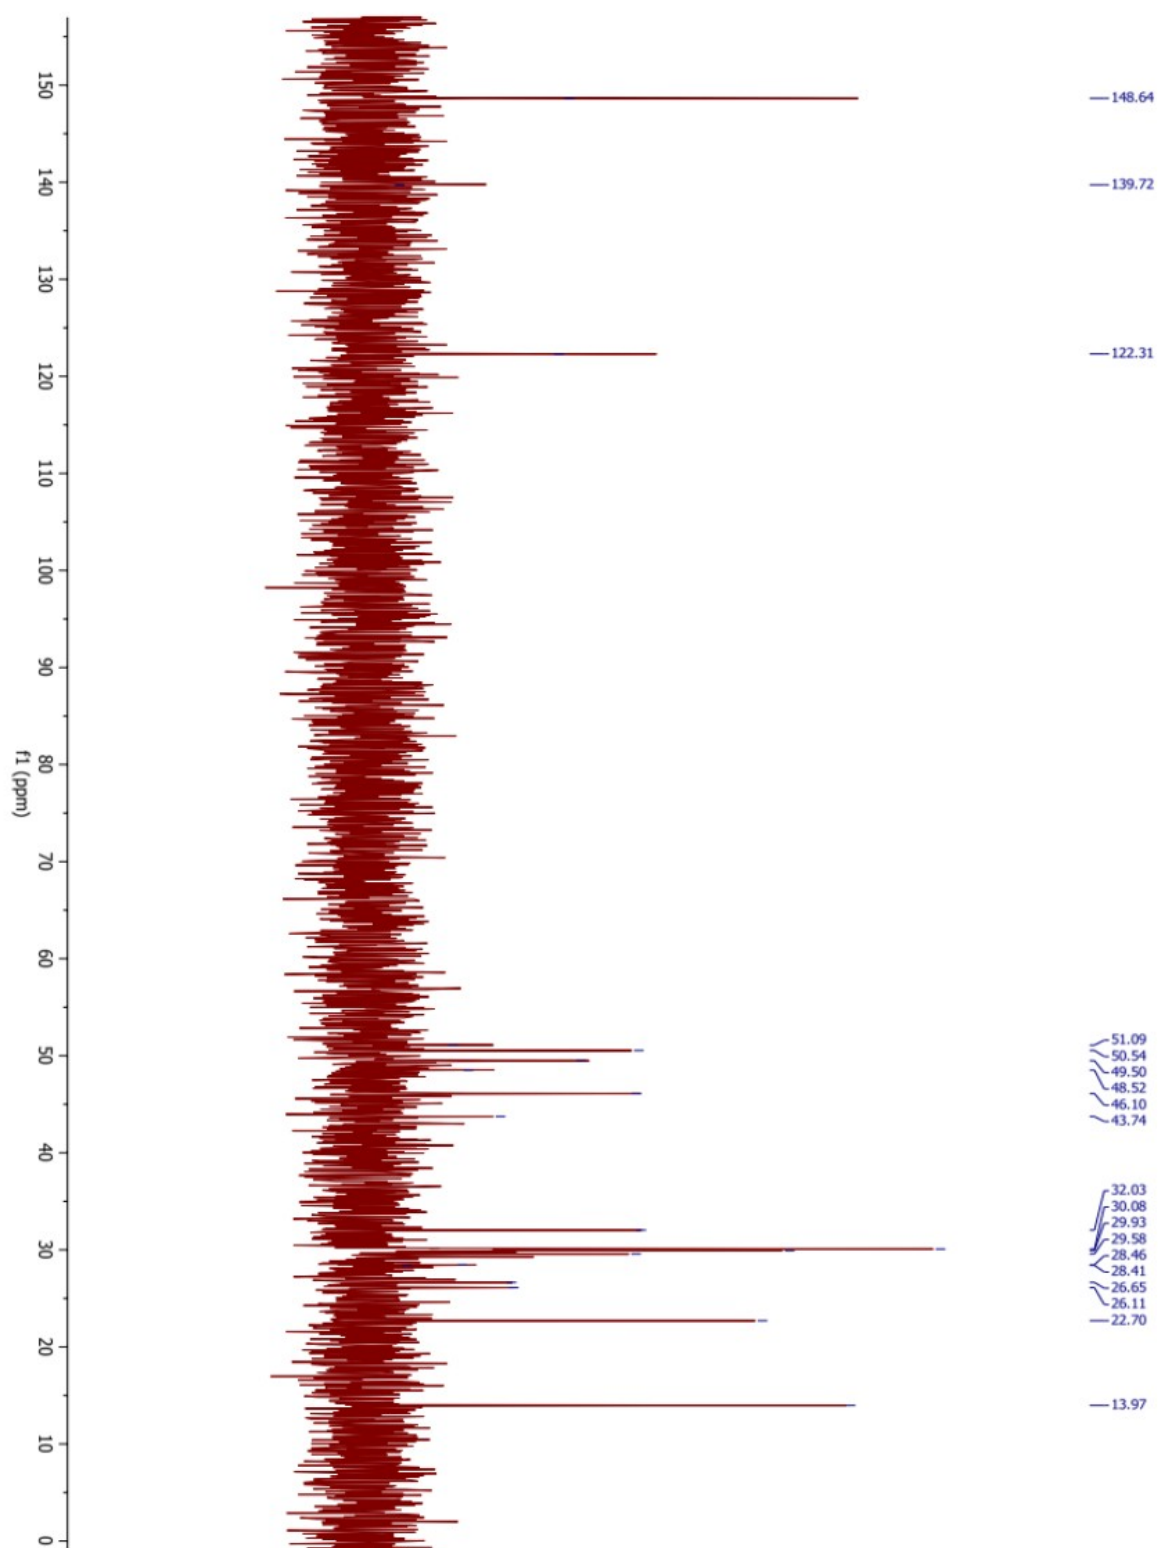

**Figure S15:**  $^1\text{H}$ -NMR spectrum for **L16m**

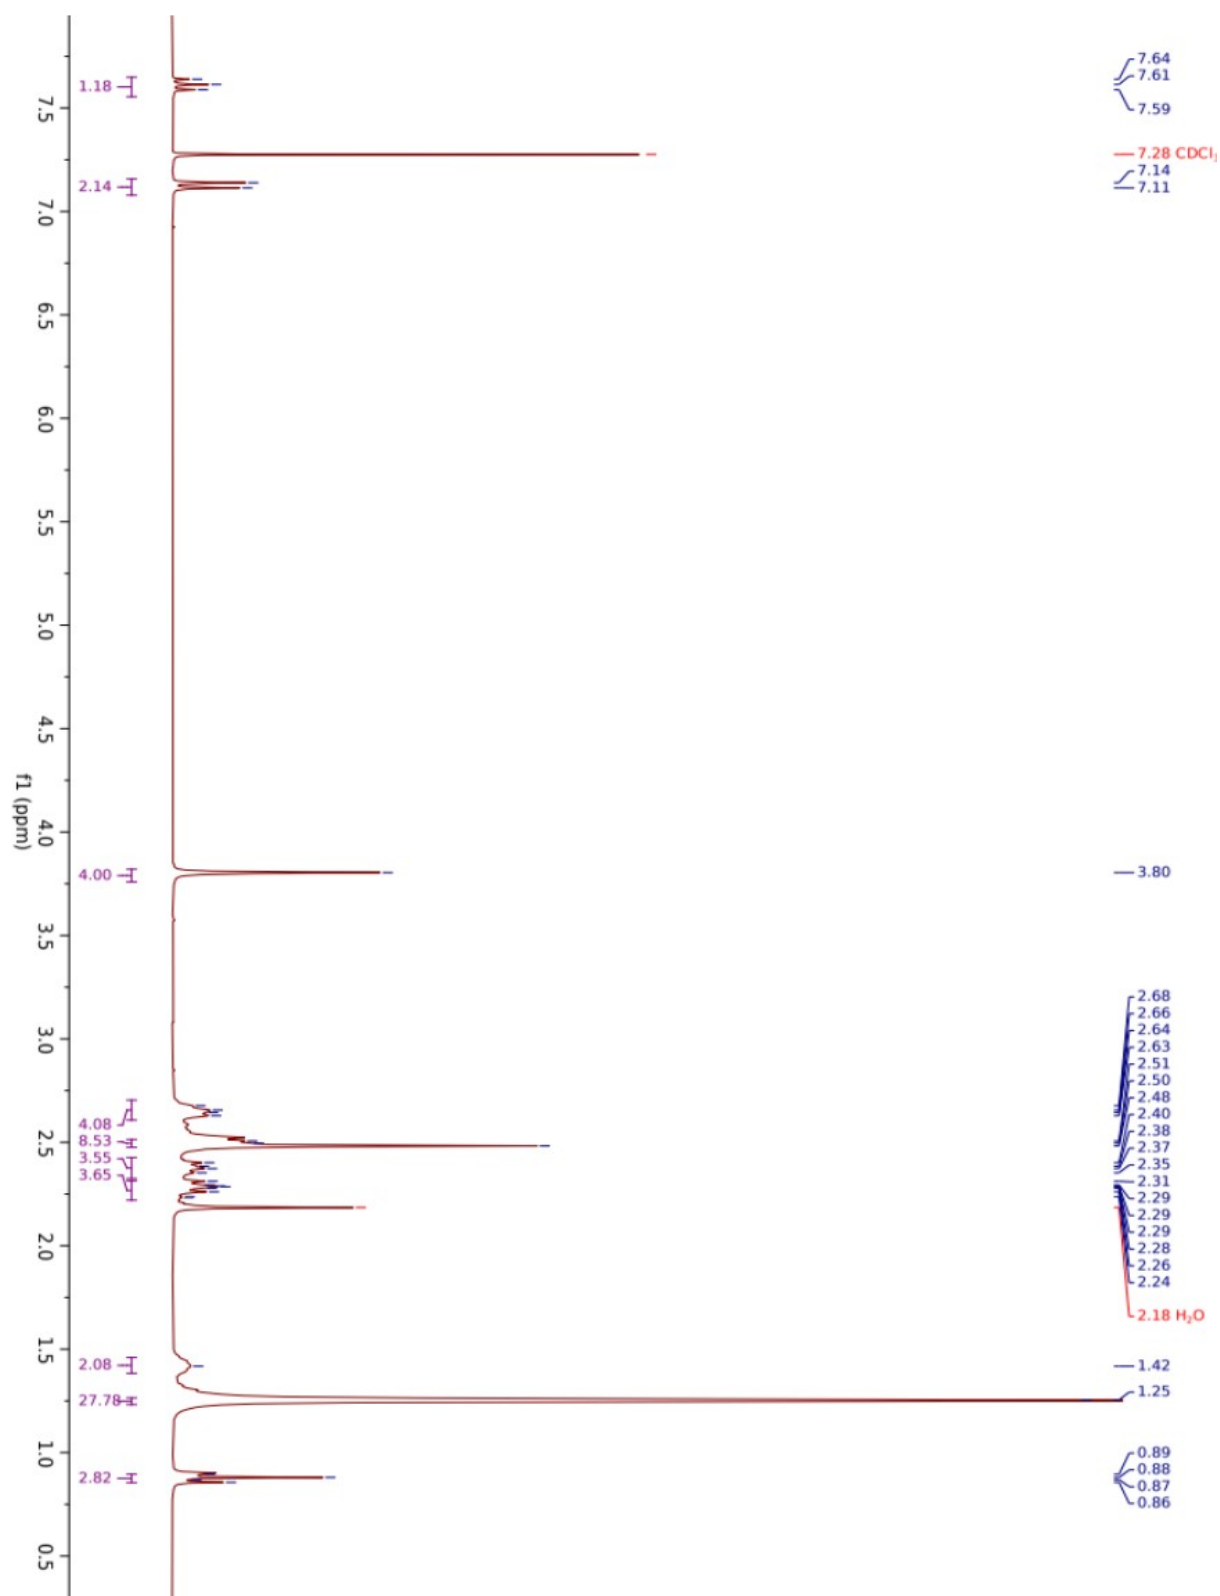

**Figure S16:**  $^{13}\text{C}$ -NMR spectrum for **L16m**

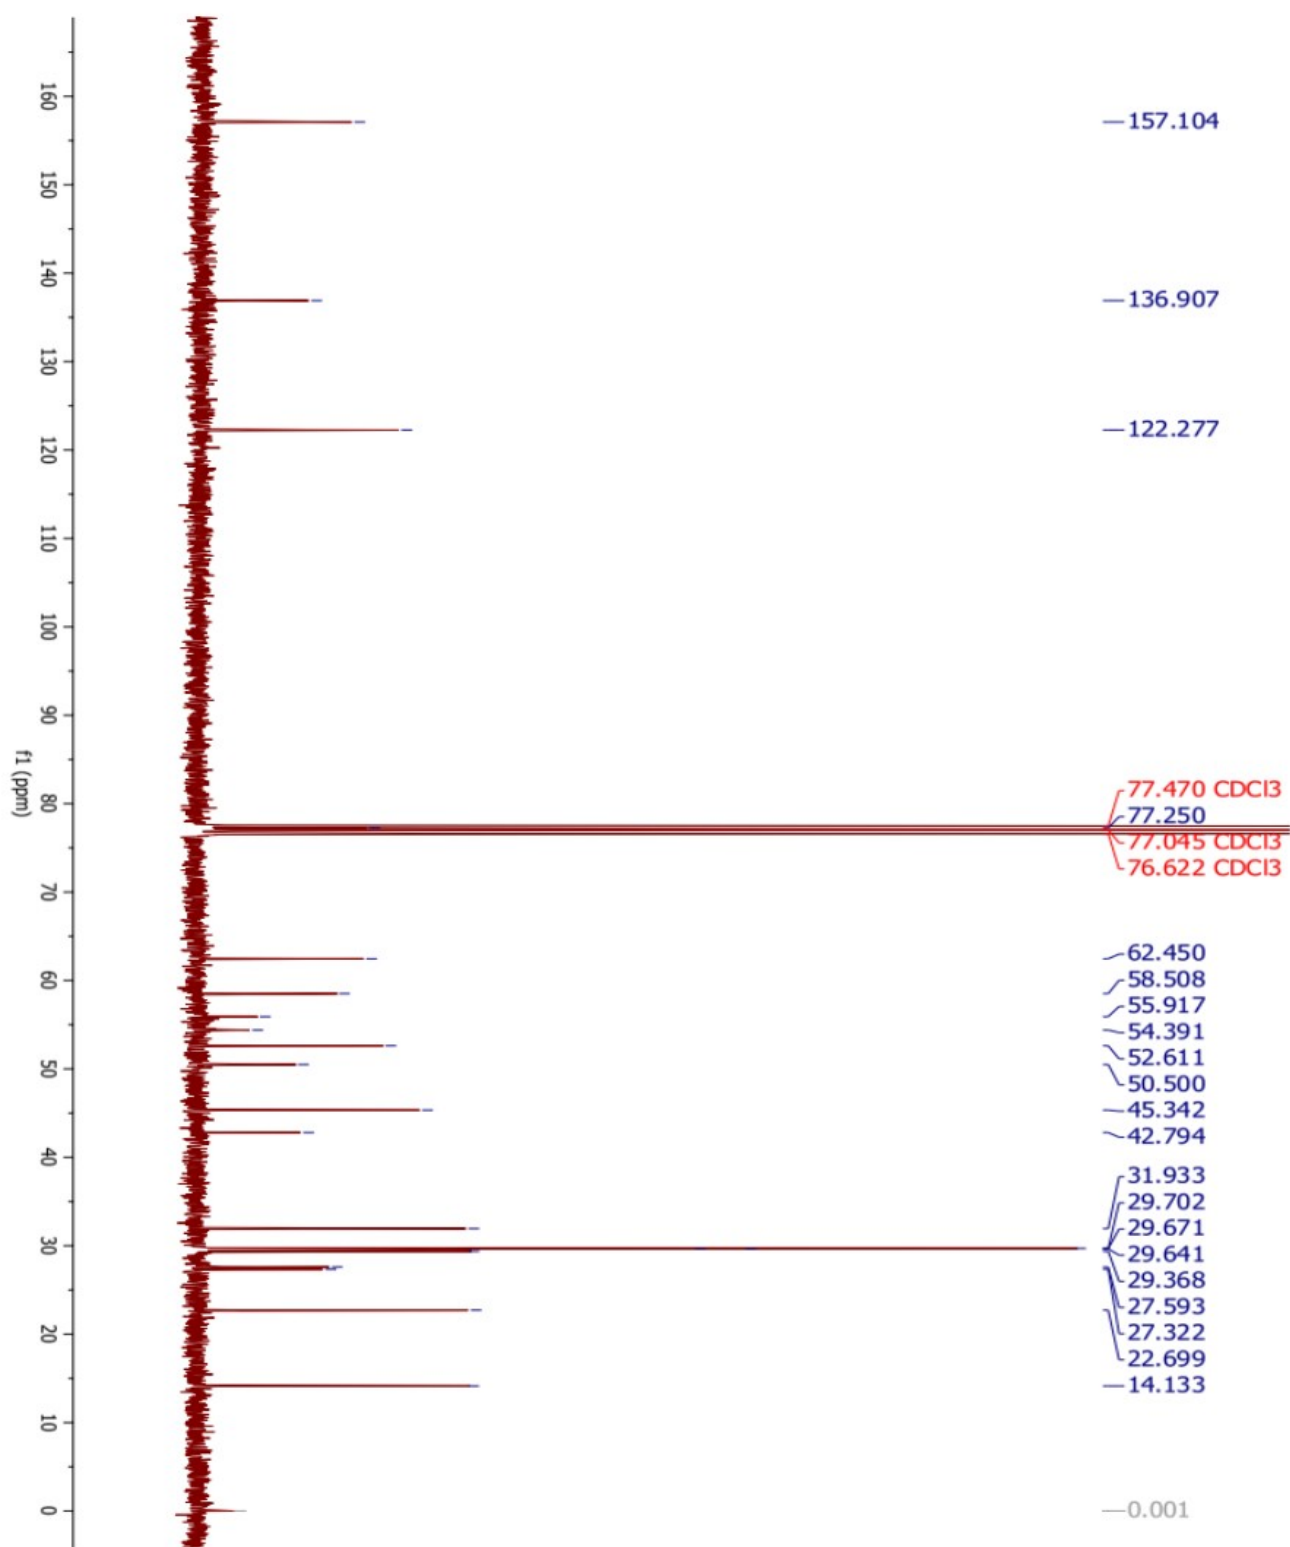



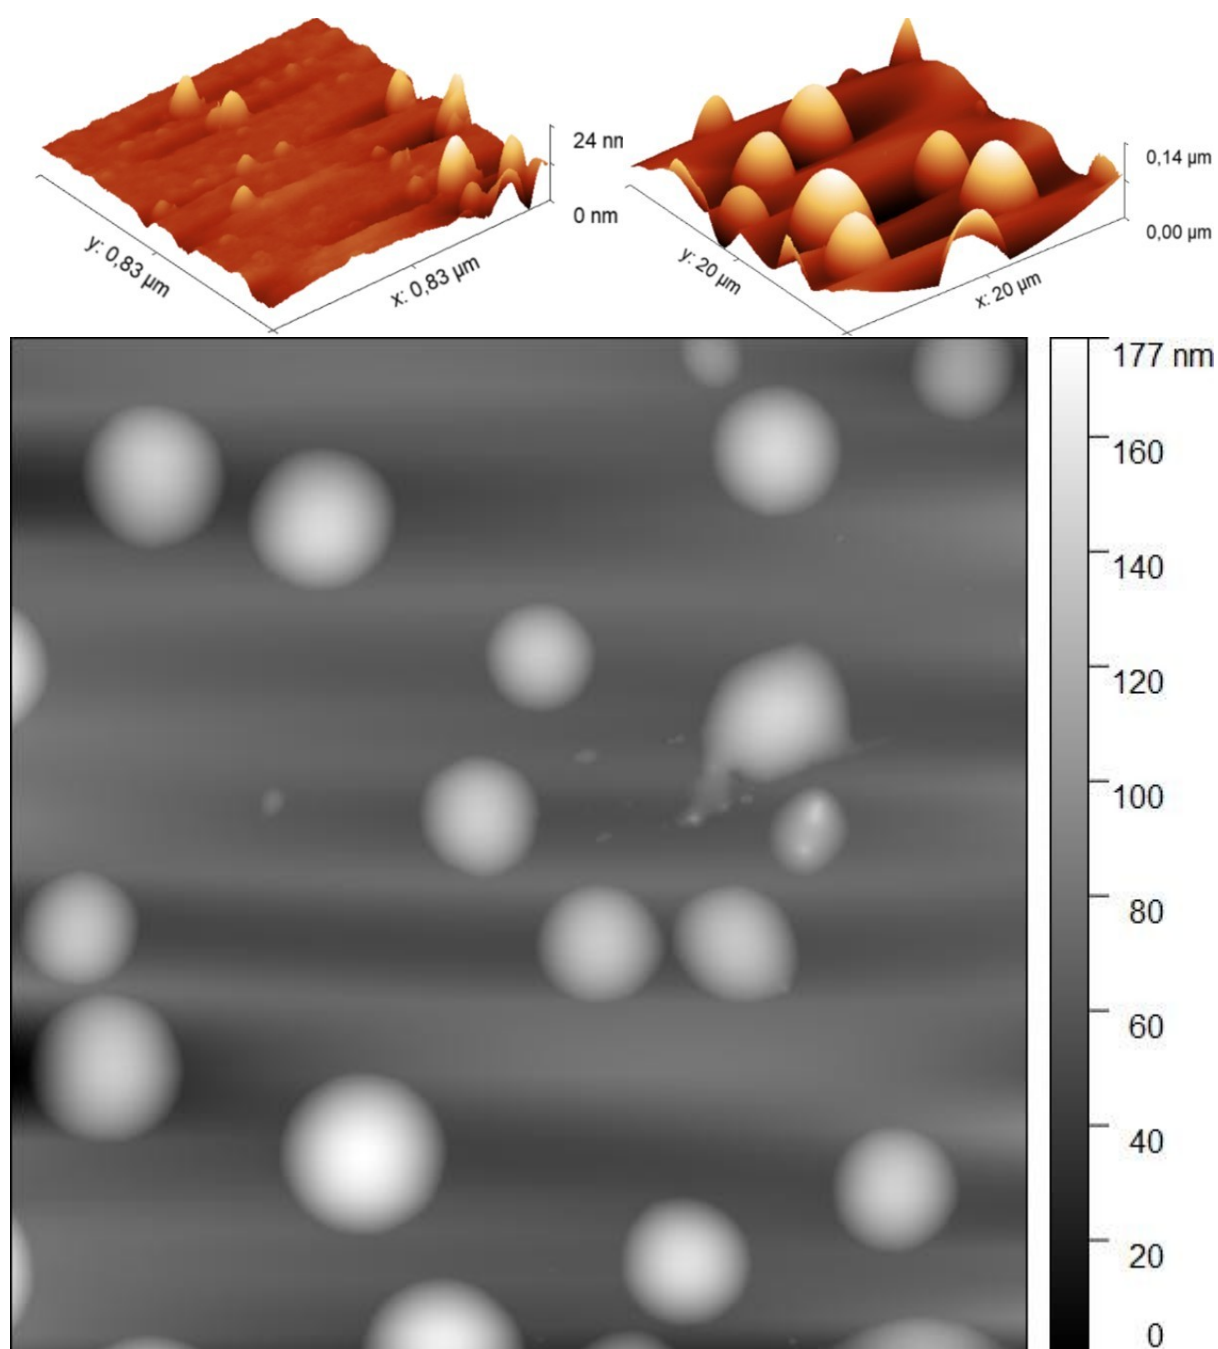

**Figure S17:** AFM images of L8 (top left) and L8m (top right and bottom).
